# Supplementary material for: Who Pays More? Gender Gaps in Mental Health Treatment Costs in India
Source: Research Square preprint supplement (doi:10.21203/rs.3.rs-6968917/v1), 2025-10-31
Supplement: Supplementary file 1 [file 39058090daf2db503882b911.docx]

**Health Care Burden of Infrequent expenditure during last 365 days**

**Table S1.** **Having unnecessary and excessive worry**

| **Background Characteristics** | **Male** | | | **Female** | | | **Total** | | | **Gap in**  **HCB** | | **Gap in OOPE** | |
| --- | --- | --- | --- | --- | --- | --- | --- | --- | --- | --- | --- | --- | --- |
| OOPE  (in ₹) | MCE  (in ₹) | Health Care Burden | OOPE  (in ₹) | MCE  (in ₹) | Health Care Burden | OOPE  (in ₹) | MCE  (in ₹) | Health Care Burden | Absolute gap | Ratio | Absolute gap | Ratio |
| *Mean*  *(in ₹)* | *Mean*  *(in ₹)* | *%* | *Mean*  *(in ₹)* | *Mean*  *(in ₹)* | *%* | *Mean*  *(in ₹)* | *Mean*  *(in ₹)* | *%* | *(M-F)* | *M/F* | *(M-F)* | *M/F* |
| **Age (in years)** |  |  |  |  |  |  |  |  |  |  |  |  |  |
| 0-14 | 9893 | 139859 | 7.1 | 4337 | 139267 | 3.1 | 7900 | 139647 | 5.7 | 4.0 | 2.3 | 5556 | 2.3 |
| 15-35 | 5952 | 125032 | 4.8 | 5377 | 144504 | 3.7 | 5753 | 131655 | 4.4 | 1.0 | 1.3 | 575 | 1.1 |
| 36-59 | 8215 | 135796 | 6.0 | 5901 | 123793 | 4.8 | 7155 | 130296 | 5.5 | 1.3 | 1.3 | 2313 | 1.4 |
| 60 and above | 9625 | 158639 | 6.1 | 10835 | 173751 | 6.2 | 10286 | 166887 | 6.2 | -0.2 | 1.0 | -1210 | 0.9 |
| **Education** |  |  |  |  |  |  |  |  |  |  |  |  |  |
| Illiterate | 7634 | 124291 | 6.1 | 8648 | 128870 | 6.7 | 8245 | 127050 | 6.5 | -0.6 | 0.9 | -1013 | 0.9 |
| Up to Primary | 6881 | 124809 | 5.5 | 3907 | 146581 | 2.7 | 5766 | 132905 | 4.3 | 2.8 | 2.1 | 2974 | 1.8 |
| Middle | 7038 | 135271 | 5.2 | 4040 | 145894 | 2.8 | 6100 | 138593 | 4.4 | 2.4 | 1.9 | 2999 | 1.7 |
| Secondary and above | 9433 | 161836 | 5.8 | 8454 | 189614 | 4.5 | 9135 | 170299 | 5.4 | 1.4 | 1.3 | 979 | 1.1 |
| **Marital Status** |  |  |  |  |  |  |  |  |  |  |  |  |  |
| Never married | 5941 | 137581 | 4.3 | 5169 | 156529 | 3.3 | 5714 | 143047 | 4.0 | 1.0 | 1.3 | 772 | 1.1 |
| Currently married | 9272 | 136052 | 6.8 | 6608 | 140178 | 4.7 | 8204 | 137706 | 6.0 | 2.1 | 1.4 | 2665 | 1.4 |
| Others | 9449 | 131119 | 7.2 | 8874 | 138441 | 6.4 | 9006 | 136753 | 6.6 | 0.8 | 1.1 | 574 | 1.1 |
| **Religion** |  |  |  |  |  |  |  |  |  |  |  |  |  |
| Hindu |  |  |  |  |  |  |  |  |  |  |  |  |  |
| Muslim | 8287 | 133101 | 6.2 | 9365 | 143983 | 6.5 | 8732 | 137599 | 6.3 | -0.3 | 1.0 | -1079 | 0.9 |
| Others | 7156 | 151398 | 4.7 | 2996 | 137360 | 2.2 | 4922 | 143859 | 3.4 | 2.5 | 2.2 | 4161 | 2.4 |
| **Caste** | 5479 | 131825 | 4.2 | 2457 | 161389 | 1.5 | 4417 | 142215 | 3.1 | 2.6 | 2.7 | 3022 | 2.2 |
| SC/ST | 7129 | 114744 | 6.2 | 15113 | 115423 | 13.1 | 10321 | 114997 | 9.0 | -6.9 | 0.5 | -7984 | 0.5 |
| OBC | 8762 | 134757 | 6.5 | 4848 | 132558 | 3.7 | 6925 | 133725 | 5.2 | 2.8 | 1.8 | 3914 | 1.8 |
| Others | 6835 | 156444 | 4.4 | 4931 | 186279 | 2.6 | 6054 | 168686 | 3.6 | 1.7 | 1.7 | 1905 | 1.4 |
| **MPCE quintile** |  |  |  |  |  |  |  |  |  |  |  |  |  |
| Poorest | 4561 | 53175 | 8.6 | 2858 | 55954 | 5.1 | 3755 | 54491 | 6.9 | 3.5 | 1.7 | 1702 | 1.6 |
| Poorer | 5665 | 90578 | 6.3 | 5075 | 90720 | 5.6 | 5436 | 90640 | 6.0 | 0.7 | 1.1 | 589 | 1.1 |
| Middle | 6776 | 121217 | 5.6 | 5788 | 122816 | 4.7 | 6404 | 121819 | 5.3 | 0.9 | 1.2 | 987 | 1.2 |
| Richer | 11667 | 169653 | 6.9 | 6171 | 173560 | 3.6 | 8811 | 171683 | 5.1 | 3.3 | 1.9 | 5496 | 1.9 |
| Richest | 11779 | 288231 | 4.1 | 18715 | 312527 | 6.0 | 14713 | 298507 | 4.9 | -1.9 | 0.7 | -6935 | 0.6 |
| **Place of residence** |  |  |  |  |  |  |  |  |  |  |  |  |  |
| Rural | 6669 | 111342 | 6.0 | 4821 | 113077 | 4.3 | 5886 | 112070 | 5.3 | 1.7 | 1.4 | 1848 | 1.4 |
| Urban | 10013 | 187043 | 5.4 | 11008 | 196380 | 5.6 | 10472 | 191348 | 5.5 | -0.3 | 1.0 | -995 | 0.9 |
| **Geographic region** |  |  |  |  |  |  |  |  |  |  |  |  |  |
| North | 11148 | 174221 | 6.4 | 8068 | 197605 | 4.1 | 9864 | 183973 | 5.4 | 2.3 | 1.6 | 3080 | 1.4 |
| Central | 10404 | 116411 | 8.9 | 8642 | 131719 | 6.6 | 9831 | 121387 | 8.1 | 2.4 | 1.4 | 1762 | 1.2 |
| East | 4307 | 103569 | 4.2 | 2862 | 101286 | 2.8 | 3581 | 102420 | 3.5 | 1.3 | 1.5 | 1445 | 1.5 |
| Northeast | 7983 | 110414 | 7.2 | 5081 | 118727 | 4.3 | 6528 | 114581 | 5.7 | 3.0 | 1.7 | 2902 | 1.6 |
| West | 7365 | 144312 | 5.1 | 22317 | 178933 | 12.5 | 11826 | 154641 | 7.6 | -7.4 | 0.4 | -14952 | 0.3 |
| South | 6767 | 155080 | 4.4 | 6118 | 152618 | 4.0 | 6430 | 153801 | 4.2 | 0.4 | 1.1 | 649 | 1.1 |
| Union Territories | 4640 | 217419 | 2.1 | 3891 | 253702 | 1.5 | 4361 | 230919 | 1.9 | 0.6 | 1.4 | 749 | 1.2 |
| **Total** | **7773** | **136335** | **5.7** | **7079** | **143478** | **4.9** | **7469** | **139440** | **5.4** | **0.8** | **1.2** | **694** | **1.1** |

**Source:** Based on the author computation fromPersons with Disabilities in India Survey, NSS, 2018

***Notes:*** *Health Care Burden = [Average (infrequent expenditure during last 365 days) out of pocket expenditure (in ₹) /Yearly Consumption Expenditure (MCE in (in ₹`)] *100*

**Table S2.** **Unusual experiences of hearing voices, seeing visions, strange smell or sensation or strange taste**

| **Background Characteristics** | **Male** | | | **Female** | | | **Total** | | | **Gap in**  **HCB** | | **Gap in OOPE** | |
| --- | --- | --- | --- | --- | --- | --- | --- | --- | --- | --- | --- | --- | --- |
| OOPE  (in ₹) | MCE  (in ₹) | Health Care Burden | OOPE  (in ₹) | MCE  (in ₹) | Health Care Burden | OOPE  (in ₹) | MCE  (in ₹) | Health Care Burden | Absolute gap | Ratio | Absolute gap | Ratio |
| *Mean*  *(in ₹)* | *Mean*  *(in ₹)* | *%* | *Mean*  *(in ₹)* | *Mean*  *(in ₹)* | *%* | *Mean*  *(in ₹)* | *Mean*  *(in ₹)* | *%* | *(M-F)* | *M/F* | *(M-F)* | *M/F* |
| **Age (in years)** |  |  |  |  |  |  |  |  |  |  |  |  |  |
| 0-14 | 7420 | 142890 | 5.2 | 8115 | 155943 | 5.2 | 7544 | 145223 | 5.2 | 0.0 | 1.0 | -696 | 0.9 |
| 15-35 | 4706 | 125677 | 3.7 | 10118 | 155053 | 6.5 | 6694 | 136465 | 4.9 | -2.8 | 0.6 | -5411 | 0.5 |
| 36-59 | 10795 | 128147 | 8.4 | 2194 | 99849 | 2.2 | 5792 | 111687 | 5.2 | 6.2 | 3.8 | 8601 | 4.9 |
| 60 and above | 17351 | 162168 | 10.7 | 10032 | 163982 | 6.1 | 13496 | 163124 | 8.3 | 4.6 | 1.7 | 7319 | 1.7 |
| **Education** |  |  |  |  |  |  |  |  |  |  |  |  |  |
| Illiterate | 4877 | 120247 | 4.1 | 7189 | 105405 | 6.8 | 6410 | 110403 | 5.8 | -2.8 | 0.6 | -2312 | 0.7 |
| Up to Primary | 11416 | 131036 | 8.7 | 2776 | 148268 | 1.9 | 7870 | 138108 | 5.7 | 6.8 | 4.7 | 8639 | 4.1 |
| Middle | 5149 | 139858 | 3.7 | 1608 | 142904 | 1.1 | 3937 | 140901 | 2.8 | 2.6 | 3.3 | 3541 | 3.2 |
| Secondary and above | 16515 | 156289 | 10.6 | 8256 | 205012 | 4.0 | 14164 | 170155 | 8.3 | 6.5 | 2.6 | 8259 | 2.0 |
| **Marital Status** |  |  |  |  |  |  |  |  |  |  |  |  |  |
| Never married | 5175 | 135227 | 3.8 | 7280 | 172332 | 4.2 | 5741 | 145209 | 4.0 | -0.4 | 0.9 | -2105 | 0.7 |
| Currently married | 15104 | 137216 | 11.0 | 11107 | 137256 | 8.1 | 13494 | 137232 | 9.8 | 2.9 | 1.4 | 3997 | 1.4 |
| Others | 12395 | 132966 | 9.3 | 2340 | 106495 | 2.2 | 3575 | 109748 | 3.3 | 7.1 | 4.2 | 10055 | 5.3 |
| **Religion** |  |  |  |  |  |  |  |  |  |  |  |  |  |
| Hindu | 11496 | 127510 | 9.0 | 7588 | 143013 | 5.3 | 9875 | 133942 | 7.4 | 3.7 | 1.7 | 3908 | 1.5 |
| Muslim | 5374 | 165107 | 3.3 | 4111 | 105798 | 3.9 | 4460 | 122162 | 3.7 | -0.6 | 0.8 | 1263 | 1.3 |
| Others | 3592 | 160601 | 2.2 | 906 | 138308 | 0.7 | 2678 | 153017 | 1.8 | 1.6 | 3.4 | 2685 | 4.0 |
| **Caste** |  |  |  |  |  |  |  |  |  |  |  |  |  |
| SC/ ST | 5821 | 112951 | 5.2 | 6529 | 116625 | 5.6 | 6129 | 114547 | 5.4 | -0.4 | 0.9 | -707 | 0.9 |
| OBC | 11970 | 128924 | 9.3 | 5289 | 105431 | 5.0 | 8080 | 115244 | 7.0 | 4.3 | 1.9 | 6681 | 2.3 |
| Others | 10063 | 159282 | 6.3 | 7192 | 206149 | 3.5 | 9021 | 176291 | 5.1 | 2.8 | 1.8 | 2871 | 1.4 |
| **MPCE quintile** |  |  |  |  |  |  |  |  |  |  |  |  |  |
| Poorest | 5089 | 54752 | 9.3 | 1960 | 56640 | 3.5 | 3318 | 55820 | 5.9 | 5.8 | 2.7 | 3128 | 2.6 |
| Poorer | 6415 | 88355 | 7.3 | 5151 | 92322 | 5.6 | 5834 | 90167 | 6.5 | 1.7 | 1.3 | 1264 | 1.2 |
| Middle | 6429 | 121843 | 5.3 | 9402 | 120939 | 7.8 | 7357 | 121561 | 6.1 | -2.5 | 0.7 | -2973 | 0.7 |
| Richer | 11000 | 167067 | 6.6 | 8705 | 177100 | 4.9 | 9900 | 171873 | 5.8 | 1.7 | 1.3 | 2295 | 1.3 |
| Richest | 14703 | 290958 | 5.1 | 12601 | 280240 | 4.5 | 13988 | 287312 | 4.9 | 0.6 | 1.1 | 2101 | 1.2 |
| **Place of residence** |  |  |  |  |  |  |  |  |  |  |  |  |  |
| Rural | 9028 | 109674 | 8.2 | 5871 | 102507 | 5.7 | 7400 | 105978 | 7.0 | 2.5 | 1.4 | 3157 | 1.5 |
| Urban | 11506 | 185041 | 6.2 | 6018 | 195736 | 3.1 | 9123 | 189685 | 4.8 | 3.1 | 2.0 | 5488 | 1.9 |
| **Geographic region** |  |  |  |  |  |  |  |  |  |  |  |  |  |
| North | 17309 | 169452 | 10.2 | 21632 | 162846 | 13.3 | 18741 | 167263 | 11.2 | -3.1 | 0.8 | -4324 | 0.8 |
| Central | 3701 | 105718 | 3.5 | 5900 | 111611 | 5.3 | 4439 | 107695 | 4.1 | -1.8 | 0.7 | -2199 | 0.6 |
| East | 9530 | 110018 | 8.7 | 2910 | 86441 | 3.4 | 5165 | 94472 | 5.5 | 5.3 | 2.6 | 6620 | 3.3 |
| Northeast | 5685 | 161955 | 3.5 | 5044 | 110464 | 4.6 | 5392 | 138407 | 3.9 | -1.1 | 0.8 | 641 | 1.1 |
| West | 15587 | 143403 | 10.9 | 16568 | 211612 | 7.8 | 15882 | 163947 | 9.7 | 3.0 | 1.4 | -982 | 0.9 |
| South | 7952 | 152460 | 5.2 | 4035 | 154558 | 2.6 | 5942 | 153536 | 3.9 | 2.6 | 2.0 | 3917 | 2.0 |
| Union Territories | 1028 | 136987 | 0.8 | 120 | 345496 | 0.0 | 396 | 282068 | 0.1 | 0.7 | 21.7 | 908 | 8.6 |
| **Total** | **9891** | **135918** | **7.3** | **5912** | **128431** | **4.6** | **7941** | **132248** | **6.0** | **2.7** | **1.6** | **3979** | **1.7** |

**Source:** Based on the author computation fromPersons with Disabilities in India Survey, NSS, 2018

***Notes:*** *Health Care Burden = [Average (infrequent expenditure during last 365 days) out of pocket expenditure (in ₹) /Yearly Consumption Expenditure (MCE in (in ₹`)] *100*

**Table S3.** **Unusual behaviour or difficulty in social interactions and adaptability**

| **Background Characteristics** | **Male** | | | **Female** | | | **Total** | | | **Gap in**  **HCB** | | **Gap in OOPE** | |
| --- | --- | --- | --- | --- | --- | --- | --- | --- | --- | --- | --- | --- | --- |
| OOPE  (in ₹) | MCE  (in ₹) | Health Care Burden | OOPE  (in ₹) | MCE  (in ₹) | Health Care Burden | OOPE  (in ₹) | MCE  (in ₹) | Health Care Burden | Absolute gap | Ratio | Absolute gap | Ratio |
| *Mean*  *(in ₹)* | *Mean*  *(in ₹)* | *%* | *Mean*  *(in ₹)* | *Mean*  *(in ₹)* | *%* | *Mean*  *(in ₹)* | *Mean*  *(in ₹)* | *%* | *(M-F)* | *M/F* | *(M-F)* | *M/F* |
| **Age (in years)** |  |  |  |  |  |  |  |  |  |  |  |  |  |
| 0-14 | 7522 | 137004 | 5.5 | 3931 | 133674 | 2.9 | 6525 | 136080 | 4.8 | 2.5 | 1.9 | 3590 | 1.9 |
| 15-35 | 6758 | 136200 | 5.0 | 7977 | 128276 | 6.2 | 7185 | 133302 | 5.4 | -1.3 | 0.8 | -1220 | 0.8 |
| 36-59 | 7635 | 148891 | 5.1 | 4403 | 114818 | 3.8 | 5984 | 131484 | 4.6 | 1.3 | 1.3 | 3231 | 1.7 |
| 60 and above | 14541 | 157887 | 9.2 | 9497 | 153980 | 6.2 | 12139 | 156026 | 7.8 | 3.0 | 1.5 | 5044 | 1.5 |
| **Education** |  |  |  |  |  |  |  |  |  |  |  |  |  |
| Illiterate | 7590 | 132421 | 5.7 | 4905 | 107775 | 4.6 | 6044 | 118229 | 5.1 | 1.2 | 1.3 | 2685 | 1.5 |
| Up to Primary | 7040 | 135177 | 5.2 | 2823 | 143641 | 2.0 | 5400 | 138371 | 3.9 | 3.2 | 2.6 | 4217 | 2.5 |
| Middle | 11019 | 152441 | 7.2 | 7338 | 151823 | 4.8 | 9742 | 152226 | 6.4 | 2.4 | 1.5 | 3681 | 1.5 |
| Secondary and above | 10714 | 169701 | 6.3 | 19194 | 169809 | 11.3 | 13123 | 169732 | 7.7 | -5.0 | 0.6 | -8480 | 0.6 |
| **Marital Status** |  |  |  |  |  |  |  |  |  |  |  |  |  |
| Never married | 6297 | 149462 | 4.2 | 6265 | 134307 | 4.7 | 6282 | 144647 | 4.3 | -0.5 | 0.9 | 32 | 1.0 |
| Currently married | 8760 | 141233 | 6.2 | 8031 | 139339 | 5.8 | 8473 | 140488 | 6.0 | 0.4 | 1.1 | 729 | 1.1 |
| Others | 20571 | 142691 | 14.4 | 5062 | 112868 | 4.5 | 8861 | 120173 | 7.4 | 9.9 | 3.2 | 15509 | 4.1 |
| **Religion** |  |  |  |  |  |  |  |  |  |  |  |  |  |
| Hindu | 9223 | 137721 | 6.7 | 8263 | 134616 | 6.1 | 8843 | 136481 | 6.5 | 0.6 | 1.1 | 960 | 1.1 |
| Muslim | 6565 | 163655 | 4.0 | 3664 | 112693 | 3.3 | 4812 | 132858 | 3.6 | 0.8 | 1.2 | 2901 | 1.8 |
| Others | 8112 | 183210 | 4.4 | 2638 | 133335 | 2.0 | 5623 | 160531 | 3.5 | 2.4 | 2.2 | 5474 | 3.1 |
| **Caste** |  |  |  |  |  |  |  |  |  |  |  |  |  |
| SC /ST | 8353 | 119512 | 7.0 | 6349 | 99719 | 6.4 | 7524 | 111423 | 6.8 | 0.6 | 1.1 | 2004 | 1.3 |
| OBC | 8874 | 138789 | 6.4 | 6645 | 122507 | 5.4 | 7773 | 130751 | 5.9 | 1.0 | 1.2 | 2229 | 1.3 |
| Others | 8778 | 169981 | 5.2 | 6053 | 157775 | 3.8 | 7718 | 165231 | 4.7 | 1.3 | 1.3 | 2724 | 1.5 |
| **MPCE quintile** |  |  |  |  |  |  |  |  |  |  |  |  |  |
| Poorest | 10367 | 55183 | 18.8 | 2097 | 59561 | 3.5 | 5151 | 57945 | 8.9 | 15.3 | 5.3 | 8270 | 4.9 |
| Poorer | 9534 | 88056 | 10.8 | 3316 | 92927 | 3.6 | 6747 | 90239 | 7.5 | 7.3 | 3.0 | 6219 | 2.9 |
| Middle | 5613 | 122211 | 4.6 | 10559 | 123678 | 8.5 | 7100 | 122652 | 5.8 | -3.9 | 0.5 | -4945 | 0.5 |
| Richer | 12910 | 169793 | 7.6 | 9431 | 175730 | 5.4 | 11005 | 173045 | 6.4 | 2.2 | 1.4 | 3479 | 1.4 |
| Richest | 12585 | 283169 | 4.4 | 12381 | 352617 | 3.5 | 12508 | 309316 | 4.0 | 0.9 | 1.3 | 204 | 1.0 |
| **Place of residence** |  |  |  |  |  |  |  |  |  |  |  |  |  |
| Rural | 7369 | 116592 | 6.3 | 5360 | 103946 | 5.2 | 6441 | 110763 | 5.8 | 1.2 | 1.2 | 2009 | 1.4 |
| Urban | 11208 | 198084 | 5.7 | 8856 | 183042 | 4.8 | 10255 | 191986 | 5.3 | 0.8 | 1.2 | 2352 | 1.3 |
| **Geographic region** |  |  |  |  |  |  |  |  |  |  |  |  |  |
| North | 15533 | 184202 | 8.4 | 12799 | 196445 | 6.5 | 14542 | 188638 | 7.7 | 1.9 | 1.3 | 2734 | 1.2 |
| Central | 7501 | 127931 | 5.9 | 9550 | 120669 | 7.9 | 8077 | 125889 | 6.4 | -2.1 | 0.7 | -2049 | 0.8 |
| East | 4801 | 110104 | 4.4 | 2945 | 91692 | 3.2 | 3828 | 100476 | 3.8 | 1.1 | 1.4 | 1857 | 1.6 |
| Northeast | 2596 | 122769 | 2.1 | 2737 | 125903 | 2.2 | 2661 | 124201 | 2.1 | -0.1 | 1.0 | -141 | 0.9 |
| West | 9518 | 176669 | 5.4 | 10400 | 169670 | 6.1 | 9857 | 173980 | 5.7 | -0.7 | 0.9 | -882 | 0.9 |
| South | 10314 | 163456 | 6.3 | 6806 | 141708 | 4.8 | 8536 | 152435 | 5.6 | 1.5 | 1.3 | 3508 | 1.5 |
| Union Territories | 10633 | 244691 | 4.3 | 4686 | 156203 | 3.0 | 8035 | 206036 | 3.9 | 1.3 | 1.4 | 5948 | 2.3 |
| **Total** | 8723 | 145326 | 6.0 | 6421 | 127954 | 5.0 | 7703 | 137626 | 5.6 | 1.0 | 1.2 | 2302 | 1.4 |

**Source:** Based on the author computation fromPersons with Disabilities in India Survey, NSS, 2018

***Notes:*** *Health Care Burden = [Average (infrequent expenditure during last 365 days) out of pocket expenditure (in ₹) /Yearly Consumption Expenditure (MCE in (in ₹`)] *100*

**Table S4.** **Mental illness (combined above all three condition)**

| **Background Characteristics** | **Male** | | | **Female** | | | **Total** | | | **Gap in**  **HCB** | | **Gap in OOPE** | |
| --- | --- | --- | --- | --- | --- | --- | --- | --- | --- | --- | --- | --- | --- |
| OOPE  (in ₹) | MCE  (in ₹) | Health Care Burden | OOPE  (in ₹) | MCE  (in ₹) | Health Care Burden | OOPE  (in ₹) | MCE  (in ₹) | Health Care Burden | Absolute gap | Ratio | Absolute gap | Ratio |
| *Mean*  *(in ₹)* | *Mean*  *(in ₹)* | *%* | *Mean*  *(in ₹)* | *Mean*  *(in ₹)* | *%* | *Mean*  *(in ₹)* | *Mean*  *(in ₹)* | *%* | *(M-F)* | *M/F* | *(M-F)* | *M/F* |
| **Age (in years)** |  |  |  |  |  |  |  |  |  |  |  |  |  |
| 0-14 | 8664 | 141059 | 6.1 | 4174 | 137335 | 3.0 | 7120 | 139779 | 5.1 | 3.1 | 2.0 | 4490 | 2.1 |
| 15-35 | 6154 | 126347 | 4.9 | 6514 | 143388 | 4.5 | 6274 | 132133 | 4.7 | 0.3 | 1.1 | -360 | 0.9 |
| 36-59 | 8899 | 137412 | 6.5 | 5841 | 125184 | 4.7 | 7512 | 131864 | 5.7 | 1.8 | 1.4 | 3058 | 1.5 |
| 60 and above | 10343 | 158294 | 6.5 | 10710 | 175611 | 6.1 | 10540 | 167619 | 6.3 | 0.4 | 1.1 | -367 | 1.0 |
| **Education** |  |  |  |  |  |  |  |  |  |  |  |  |  |
| Illiterate | 8100 | 127514 | 6.4 | 8557 | 131342 | 6.5 | 8365 | 129735 | 6.4 | -0.2 | 1.0 | -457 | 0.9 |
| Up to Primary | 7180 | 126805 | 5.7 | 3534 | 145929 | 2.4 | 5797 | 134008 | 4.3 | 3.2 | 2.3 | 3647 | 2.0 |
| Middle | 7885 | 135420 | 5.8 | 4906 | 144563 | 3.4 | 6968 | 138234 | 5.0 | 2.4 | 1.7 | 2980 | 1.6 |
| Secondary and above | 9475 | 161737 | 5.9 | 10058 | 187068 | 5.4 | 9654 | 169519 | 5.7 | 0.5 | 1.1 | -583 | 0.9 |
| **Marital Status** |  |  |  |  |  |  |  |  |  |  |  |  |  |
| Never married | 6080 | 138737 | 4.4 | 5769 | 153625 | 3.8 | 5987 | 143027 | 4.2 | 0.6 | 1.2 | 310 | 1.1 |
| Currently married | 9424 | 136654 | 6.9 | 7029 | 140612 | 5.0 | 8462 | 138243 | 6.1 | 1.9 | 1.4 | 2395 | 1.3 |
| Others | 12498 | 135033 | 9.3 | 8601 | 141847 | 6.1 | 9575 | 140144 | 6.8 | 3.2 | 1.5 | 3897 | 1.5 |
| **Religion** |  |  |  |  |  |  |  |  |  |  |  |  |  |
| Hindu | 8687 | 134399 | 6.5 | 9229 | 143917 | 6.4 | 8907 | 138285 | 6.4 | 0.1 | 1.0 | -542 | 0.9 |
| Muslim | 7408 | 150607 | 4.9 | 3690 | 141242 | 2.6 | 5447 | 145667 | 3.7 | 2.3 | 1.9 | 3719 | 2.0 |
| Others | 5748 | 136110 | 4.2 | 2564 | 158189 | 1.6 | 4619 | 143936 | 3.2 | 2.6 | 2.6 | 3184 | 2.2 |
| **Caste** |  |  |  |  |  |  |  |  |  |  |  |  |  |
| ST | 10413 | 114667 | 9.1 | 11675 | 107136 | 10.9 | 10988 | 111235 | 9.9 | -1.8 | 0.8 | -1263 | 0.9 |
| SC | 6573 | 113584 | 5.8 | 14688 | 116259 | 12.6 | 9711 | 114601 | 8.5 | -6.8 | 0.5 | -8115 | 0.4 |
| OBC | 9276 | 134615 | 6.9 | 5152 | 133444 | 3.9 | 7381 | 134077 | 5.5 | 3.0 | 1.8 | 4124 | 1.8 |
| Others | 7153 | 160190 | 4.5 | 5898 | 187701 | 3.1 | 6646 | 171309 | 3.9 | 1.3 | 1.4 | 1255 | 1.2 |
| **MPCE quintile** |  |  |  |  |  |  |  |  |  |  |  |  |  |
| Poorest | 4477 | 53386 | 8.4 | 3112 | 55883 | 5.6 | 3821 | 54586 | 7.0 | 2.8 | 1.5 | 1366 | 1.4 |
| Poorer | 5756 | 90110 | 6.4 | 4888 | 90873 | 5.4 | 5427 | 90403 | 6.0 | 1.0 | 1.2 | 868 | 1.2 |
| Middle | 6794 | 121431 | 5.6 | 6403 | 122237 | 5.2 | 6650 | 121726 | 5.5 | 0.4 | 1.1 | 391 | 1.1 |
| Richer | 11128 | 168362 | 6.6 | 6662 | 173994 | 3.8 | 8878 | 171199 | 5.2 | 2.8 | 1.7 | 4466 | 1.7 |
| Richest | 14308 | 289780 | 4.9 | 18098 | 315006 | 5.7 | 15895 | 300348 | 5.3 | -0.8 | 0.9 | -3790 | 0.8 |
| **Place of residence** |  |  |  |  |  |  |  |  |  |  |  |  |  |
| Rural | 7164 | 112672 | 6.4 | 4949 | 112143 | 4.4 | 6241 | 112447 | 5.6 | 1.9 | 1.4 | 2214 | 1.4 |
| Urban | 10145 | 187256 | 5.4 | 11212 | 199125 | 5.6 | 10632 | 192669 | 5.5 | -0.2 | 1.0 | -1067 | 0.9 |
| **Geographic region** |  |  |  |  |  |  |  |  |  |  |  |  |  |
| North | 13183 | 177808 | 7.4 | 8156 | 199798 | 4.1 | 11123 | 186818 | 6.0 | 3.3 | 1.8 | 5027 | 1.6 |
| Central | 10001 | 119592 | 8.4 | 8501 | 130550 | 6.5 | 9534 | 123004 | 7.8 | 1.9 | 1.3 | 1500 | 1.2 |
| East | 4105 | 105538 | 3.9 | 3253 | 100173 | 3.2 | 3691 | 102937 | 3.6 | 0.6 | 1.2 | 851 | 1.3 |
| Northeast | 6180 | 108478 | 5.7 | 4499 | 118059 | 3.8 | 5325 | 113350 | 4.7 | 1.9 | 1.5 | 1682 | 1.4 |
| West | 6806 | 146298 | 4.7 | 23018 | 188148 | 12.2 | 11919 | 159499 | 7.5 | -7.6 | 0.4 | -16212 | 0.3 |
| South | 8091 | 153471 | 5.3 | 5965 | 151216 | 3.9 | 6988 | 152301 | 4.6 | 1.3 | 1.3 | 2126 | 1.4 |
| Union Territories | 6289 | 225968 | 2.8 | 4221 | 257977 | 1.6 | 5369 | 240212 | 2.2 | 1.1 | 1.7 | 2068 | 1.5 |
| **Total** | **8155** | **137470** | **5.9** | **7264** | **144283** | **5.0** | **7770** | **140390** | **5.5** | **0.9** | **1.2** | **892** | **1.1** |

**Source:** Based on the author computation fromPersons with Disabilities in India Survey, NSS, 2018

***Notes:*** *Health Care Burden = [Average (infrequent expenditure during last 365 days) out of pocket expenditure (in ₹) /Yearly Consumption Expenditure (MCE in (in ₹`)] *100*

**Health Care Burden of** **usual monthly expenditure (excluding yearly expenditure)**

**Table S5. Having unnecessary and excessive worry**

| **Background Characteristics** | **Male** | | | **Female** | | | **Total** | | | **Gap in**  **HCB** | | **Gap in OOPE** | |
| --- | --- | --- | --- | --- | --- | --- | --- | --- | --- | --- | --- | --- | --- |
| **OOPE**  **(in ₹)** | **MCE**  **(in ₹)** | **Health Care Burden** | **OOPE**  **(in ₹)** | **MCE**  **(in ₹)** | **Health Care Burden** | **OOPE**  **(in ₹)** | **MCE**  **(in ₹)** | **Health Care Burden** | **Absolute gap** | **Ratio** | **Absolute gap** | **Ratio** |
| ***Mean***  ***(in ₹)*** | ***Mean***  ***(in ₹)*** | ***%*** | ***Mean***  ***(in ₹)*** | ***Mean***  ***(in ₹)*** | ***%*** | ***Mean***  ***(in ₹)*** | ***Mean***  ***(in ₹)*** | ***%*** | ***(M-F)*** | ***M/F*** | ***(M-F)*** | ***M/F*** |
| **Age (in years)** |  |  |  |  |  |  |  |  |  |  |  |  |  |
| 0-14 | 1833 | 11655 | 15.7 | 1524 | 11606 | 13.1 | 1722 | 11637 | 14.8 | 2.6 | 1.2 | 309 | 1.2 |
| 15-35 | 1363 | 10419 | 13.1 | 1329 | 12042 | 11.0 | 1350 | 10971 | 12.3 | 2.0 | 1.2 | 34 | 1.0 |
| 36-59 | 1560 | 11316 | 13.8 | 1123 | 10316 | 10.9 | 1360 | 10858 | 12.5 | 2.9 | 1.3 | 438 | 1.4 |
| 60 and above | 1758 | 13220 | 13.3 | 1465 | 14479 | 10.1 | 1598 | 13907 | 11.5 | 3.2 | 1.3 | 293 | 1.2 |
| **Education** |  |  |  |  |  |  |  |  |  |  |  |  |  |
| Illiterate | 1390 | 10358 | 13.4 | 1130 | 10739 | 10.5 | 1234 | 10588 | 11.7 | 2.9 | 1.3 | 260 | 1.2 |
| Up to Primary | 1391 | 10401 | 13.4 | 1279 | 12215 | 10.5 | 1348 | 11075 | 12.2 | 2.9 | 1.3 | 111 | 1.1 |
| Middle | 1537 | 11273 | 13.6 | 1333 | 12158 | 11.0 | 1473 | 11549 | 12.8 | 2.7 | 1.2 | 204 | 1.2 |
| Secondary and above | 1870 | 13486 | 13.9 | 1827 | 15801 | 11.6 | 1857 | 14192 | 13.1 | 2.3 | 1.2 | 42 | 1.0 |
| **Marital Status** |  |  |  |  |  |  |  |  |  |  |  |  |  |
| Never married | 1448 | 11465 | 12.6 | 1293 | 13044 | 9.9 | 1402 | 11921 | 11.8 | 2.7 | 1.3 | 155 | 1.1 |
| Currently married | 1633 | 11338 | 14.4 | 1444 | 11682 | 12.4 | 1557 | 11475 | 13.6 | 2.0 | 1.2 | 190 | 1.1 |
| Others | 1569 | 10927 | 14.4 | 1111 | 11537 | 9.6 | 1216 | 11396 | 10.7 | 4.7 | 1.5 | 458 | 1.4 |
| **Religion** |  |  |  |  |  |  |  |  |  |  |  |  |  |
| Hindu | 1584 | 11092 | 14.3 | 1427 | 11999 | 11.9 | 1518 | 11467 | 13.2 | 2.4 | 1.2 | 157 | 1.1 |
| Muslim | 1446 | 12617 | 11.5 | 930 | 11447 | 8.1 | 1169 | 11988 | 9.8 | 3.3 | 1.4 | 516 | 1.6 |
| Others | 1449 | 10985 | 13.2 | 1396 | 13449 | 10.4 | 1430 | 11851 | 12.1 | 2.8 | 1.3 | 53 | 1.0 |
| **Caste** |  |  |  |  |  |  |  |  |  |  |  |  |  |
| SC/ST | 1454 | 9562 | 15.2 | 1329 | 9619 | 13.8 | 1403 | 9583 | 14.6 | 1.4 | 1.1 | 125 | 1.1 |
| OBC | 1494 | 11230 | 13.3 | 1095 | 11046 | 9.9 | 1307 | 11144 | 11.7 | 3.4 | 1.3 | 399 | 1.4 |
| Others | 1691 | 13037 | 13.0 | 1617 | 15523 | 10.4 | 1660 | 14057 | 11.8 | 2.6 | 1.2 | 74 | 1.0 |
| **MPCE quintile** |  |  |  |  |  |  |  |  |  |  |  |  |  |
| Poorest | 879 | 4431 | 19.8 | 665 | 4663 | 14.3 | 778 | 4541 | 17.1 | 5.6 | 1.4 | 214 | 1.3 |
| Poorer | 1256 | 7548 | 16.6 | 1199 | 7560 | 15.9 | 1233 | 7553 | 16.3 | 0.8 | 1.0 | 57 | 1.0 |
| Middle | 1477 | 10101 | 14.6 | 1350 | 10235 | 13.2 | 1429 | 10152 | 14.1 | 1.4 | 1.1 | 127 | 1.1 |
| Richer | 1900 | 14138 | 13.4 | 1338 | 14463 | 9.2 | 1608 | 14307 | 11.2 | 4.2 | 1.5 | 562 | 1.4 |
| Richest | 2472 | 24019 | 10.3 | 2177 | 26044 | 8.4 | 2347 | 24876 | 9.4 | 1.9 | 1.2 | 295 | 1.1 |
| **Place of residence** |  |  |  |  |  |  |  |  |  |  |  |  |  |
| Rural | 1369 | 9278 | 14.8 | 1198 | 9423 | 12.7 | 1296 | 9339 | 13.9 | 2.0 | 1.2 | 172 | 1.1 |
| Urban | 1897 | 15587 | 12.2 | 1444 | 16365 | 8.8 | 1688 | 15946 | 10.6 | 3.4 | 1.4 | 454 | 1.3 |
| **Geographic region** |  |  |  |  |  |  |  |  |  |  |  |  |  |
| North | 2113 | 14518 | 14.6 | 1896 | 16467 | 11.5 | 2022 | 15331 | 13.2 | 3.0 | 1.3 | 217 | 1.1 |
| Central | 1756 | 9701 | 18.1 | 1750 | 10977 | 15.9 | 1754 | 10116 | 17.3 | 2.2 | 1.1 | 6 | 1.0 |
| East | 1105 | 8631 | 12.8 | 1024 | 8441 | 12.1 | 1063 | 8535 | 12.5 | 0.7 | 1.1 | 81 | 1.1 |
| Northeast | 1120 | 9201 | 12.2 | 994 | 9894 | 10.0 | 1057 | 9548 | 11.1 | 2.1 | 1.2 | 126 | 1.1 |
| West | 1262 | 12026 | 10.5 | 1460 | 14911 | 9.8 | 1321 | 12887 | 10.3 | 0.7 | 1.1 | -199 | 0.9 |
| South | 1570 | 12923 | 12.1 | 1049 | 12718 | 8.2 | 1299 | 12817 | 10.1 | 3.9 | 1.5 | 520 | 1.5 |
| Union Territories | 2090 | 18118 | 11.5 | 1039 | 21142 | 4.9 | 1699 | 19243 | 8.8 | 6.6 | 2.3 | 1051 | 2.0 |
| **Total** | **1544** | **11361** | **13.6** | **1287** | **11957** | **10.8** | **1432** | **11620** | **12.3** | **2.8** | **1.3** | **256** | **1.2** |

**Source:** Based on the author computation fromPersons with Disabilities in India Survey, NSS, 2018

***Notes:*** *Health Care Burden = [Average (usual monthly expenditure excluding yearly expenditure) out of pocket expenditure (in ₹) /Monthly Consumption Expenditure (MCE in (in ₹`)] *100*

**Table S6. Unusual experiences of hearing voices, seeing visions, strange smell or sensation or strange taste**

| **Background Characteristics** | **Male** | | | **Female** | | | **Total** | | | **Gap in**  **HCB** | | **Gap in OOPE** | |
| --- | --- | --- | --- | --- | --- | --- | --- | --- | --- | --- | --- | --- | --- |
| **OOPE**  **(in ₹)** | **MCE**  **(in ₹)** | **Health Care Burden** | **OOPE**  **(in ₹)** | **MCE**  **(in ₹)** | **Health Care Burden** | **OOPE**  **(in ₹)** | **MCE**  **(in ₹)** | **Health Care Burden** | **Absolute gap** | **Ratio** | **Absolute gap** | **Ratio** |
| ***Mean***  ***(in ₹)*** | ***Mean***  ***(in ₹)*** | ***%*** | ***Mean***  ***(in ₹)*** | ***Mean***  ***(in ₹)*** | ***%*** | ***Mean***  ***(in ₹)*** | ***Mean***  ***(in ₹)*** | ***%*** | ***(M-F)*** | ***M/F*** | ***(M-F)*** | ***M/F*** |
| **Age (in years)** |  |  |  |  |  |  |  |  |  |  |  |  |  |
| 0-14 | 1855 | 11908 | 15.6 | 782 | 12995 | 6.0 | 1663 | 12102 | 13.7 | 9.6 | 2.6 | 1073 | 2.4 |
| 15-35 | 1571 | 10473 | 15.0 | 1272 | 12921 | 9.8 | 1461 | 11372 | 12.8 | 5.1 | 1.5 | 298 | 1.2 |
| 36-59 | 1563 | 10679 | 14.6 | 881 | 8321 | 10.6 | 1166 | 9307 | 12.5 | 4.1 | 1.4 | 683 | 1.8 |
| 60 and above | 2295 | 13514 | 17.0 | 1856 | 13665 | 13.6 | 2064 | 13594 | 15.2 | 3.4 | 1.3 | 439 | 1.2 |
| **Education** |  |  |  |  |  |  |  |  |  |  |  |  |  |
| Illiterate | 1647 | 10021 | 16.4 | 1014 | 8784 | 11.5 | 1227 | 9200 | 13.3 | 4.9 | 1.4 | 633 | 1.6 |
| Up to Primary | 1633 | 10920 | 15.0 | 1376 | 12356 | 11.1 | 1527 | 11509 | 13.3 | 3.8 | 1.3 | 257 | 1.2 |
| Middle | 1543 | 11655 | 13.2 | 1624 | 11909 | 13.6 | 1570 | 11742 | 13.4 | -0.4 | 1.0 | -81 | 0.9 |
| Secondary and above | 2110 | 13024 | 16.2 | 1611 | 17084 | 9.4 | 1968 | 14180 | 13.9 | 6.8 | 1.7 | 499 | 1.3 |
| **Marital Status** |  |  |  |  |  |  |  |  |  |  |  |  |  |
| Never married | 1603 | 11269 | 14.2 | 1212 | 14361 | 8.4 | 1498 | 12101 | 12.4 | 5.8 | 1.7 | 391 | 1.3 |
| Currently married | 1912 | 11435 | 16.7 | 1635 | 11438 | 14.3 | 1800 | 11436 | 15.7 | 2.4 | 1.2 | 277 | 1.2 |
| Others | 1816 | 11081 | 16.4 | 953 | 8875 | 10.7 | 1059 | 9146 | 11.6 | 5.7 | 1.5 | 863 | 1.9 |
| **Religion** |  |  |  |  |  |  |  |  |  |  |  |  |  |
| Hindu | 1778 | 10626 | 16.7 | 1589 | 11918 | 13.3 | 1700 | 11162 | 15.2 | 3.4 | 1.3 | 188 | 1.1 |
| Muslim | 1462 | 13759 | 10.6 | 672 | 8817 | 7.6 | 890 | 10180 | 8.7 | 3.0 | 1.4 | 789 | 2.2 |
| Others | 1949 | 13383 | 14.6 | 1003 | 11526 | 8.7 | 1627 | 12751 | 12.8 | 5.9 | 1.7 | 946 | 1.9 |
| **Caste** |  |  |  |  |  |  |  |  |  |  |  |  |  |
| SC/ST | 1418 | 9413 | 15.1 | 1511 | 9719 | 15.5 | 1458 | 9546 | 15.3 | -0.5 | 1.0 | -93 | 0.9 |
| OBC | 1746 | 10744 | 16.3 | 990 | 8786 | 11.3 | 1306 | 9604 | 13.6 | 5.0 | 1.4 | 756 | 1.8 |
| Others | 1969 | 13273 | 14.8 | 1573 | 17179 | 9.2 | 1825 | 14691 | 12.4 | 5.7 | 1.6 | 396 | 1.3 |
| **MPCE quintile** |  |  |  |  |  |  |  |  |  |  |  |  |  |
| Poorest | 1101 | 4599 | 23.9 | 524 | 4963 | 10.6 | 737 | 4829 | 15.3 | 13.4 | 2.3 | 577 | 2.1 |
| Poorer | 1528 | 7338 | 20.8 | 1261 | 7744 | 16.3 | 1408 | 7520 | 18.7 | 4.5 | 1.3 | 267 | 1.2 |
| Middle | 1729 | 10184 | 17.0 | 1282 | 10307 | 12.4 | 1595 | 10221 | 15.6 | 4.5 | 1.4 | 447 | 1.3 |
| Richer | 2205 | 14149 | 15.6 | 2120 | 14644 | 14.5 | 2158 | 14420 | 15.0 | 1.1 | 1.1 | 85 | 1.0 |
| Richest | 2429 | 23597 | 10.3 | 1763 | 29385 | 6.0 | 2179 | 25776 | 8.5 | 4.3 | 1.7 | 667 | 1.4 |
| **Place of residence** |  |  |  |  |  |  |  |  |  |  |  |  |  |
| Rural | 1564 | 9140 | 17.1 | 1068 | 8542 | 12.5 | 1308 | 8832 | 14.8 | 4.6 | 1.4 | 496 | 1.5 |
| Urban | 2096 | 15420 | 13.6 | 1566 | 16311 | 9.6 | 1866 | 15807 | 11.8 | 4.0 | 1.4 | 530 | 1.3 |
| **Geographic region** |  |  |  |  |  |  |  |  |  |  |  |  |  |
| North | 2221 | 14121 | 15.7 | 2515 | 13571 | 18.5 | 2319 | 13939 | 16.6 | -2.8 | 0.8 | -294 | 0.9 |
| Central | 1656 | 8810 | 18.8 | 1652 | 9301 | 17.8 | 1654 | 8975 | 18.4 | 1.0 | 1.1 | 4 | 1.0 |
| East | 1668 | 9168 | 18.2 | 792 | 7203 | 11.0 | 1090 | 7873 | 13.8 | 7.2 | 1.7 | 876 | 2.1 |
| Northeast | 1505 | 13496 | 11.1 | 815 | 9205 | 8.9 | 1189 | 11534 | 10.3 | 2.3 | 1.3 | 690 | 1.8 |
| West | 1744 | 11950 | 14.6 | 1428 | 17634 | 8.1 | 1649 | 13662 | 12.1 | 6.5 | 1.8 | 316 | 1.2 |
| South | 1651 | 12705 | 13.0 | 1245 | 12880 | 9.7 | 1443 | 12795 | 11.3 | 3.3 | 1.3 | 406 | 1.3 |
| Union Territories | 568 | 11416 | 5.0 | 1202 | 28791 | 4.2 | 1009 | 23506 | 4.3 | 0.8 | 1.2 | -635 | 0.5 |
| **Total** | **1749** | **11326** | **15.4** | **1206** | **10703** | **11.3** | **1483** | **11021** | **13.5** | **4.2** | **1.4** | **543** | **1.4** |

**Source:** Based on the author computation fromPersons with Disabilities in India Survey, NSS, 2018

***Notes:*** *Health Care Burden = [Average (usual monthly expenditure excluding yearly expenditure) out of pocket expenditure (in ₹) /Monthly Consumption Expenditure (MCE in (in ₹`)] *100*

**Table S7. Unusual behaviour or difficulty in social interactions and adaptability**

| **Background Characteristics** | **Male** | | | **Female** | | | **Total** | | | **Gap in**  **HCB** | | **Gap in OOPE** | |
| --- | --- | --- | --- | --- | --- | --- | --- | --- | --- | --- | --- | --- | --- |
| **OOPE**  **(in ₹)** | **MCE**  **(in ₹)** | **Health Care Burden** | **OOPE**  **(in ₹)** | **MCE**  **(in ₹)** | **Health Care Burden** | **OOPE**  **(in ₹)** | **MCE**  **(in ₹)** | **Health Care Burden** | **Absolute gap** | **Ratio** | **Absolute gap** | **Ratio** |
| ***Mean***  ***(in ₹)*** | ***Mean***  ***(in ₹)*** | ***%*** | ***Mean***  ***(in ₹)*** | ***Mean***  ***(in ₹)*** | ***%*** | ***Mean***  ***(in ₹)*** | ***Mean***  ***(in ₹)*** | ***%*** | ***(M-F)*** | ***M/F*** | ***(M-F)*** | ***M/F*** |
| **Age (in years)** |  |  |  |  |  |  |  |  |  |  |  |  |  |
| 0-14 | 1726 | 11417 | 15.1 | 822 | 11140 | 7.4 | 1475 | 11340 | 13.0 | 7.7 | 2.0 | 904 | 2.1 |
| 15-35 | 1427 | 11350 | 12.6 | 1431 | 10690 | 13.4 | 1426 | 11108 | 12.8 | -0.8 | 0.9 | -4 | 1.0 |
| 36-59 | 1583 | 12408 | 12.8 | 985 | 9568 | 10.3 | 1278 | 10957 | 11.7 | 2.5 | 1.2 | 599 | 1.6 |
| 60 and above | 2073 | 13157 | 15.8 | 1897 | 12832 | 14.8 | 1989 | 13002 | 15.3 | 1.0 | 1.1 | 176 | 1.1 |
| **Education** |  |  |  |  |  |  |  |  |  |  |  |  |  |
| Illiterate | 1564 | 11035 | 14.2 | 1019 | 8981 | 11.4 | 1251 | 9852 | 12.7 | 2.8 | 1.2 | 545 | 1.5 |
| Up to Primary | 1514 | 11265 | 13.4 | 1318 | 11970 | 11.0 | 1435 | 11531 | 12.4 | 2.4 | 1.2 | 196 | 1.1 |
| Middle | 1612 | 12703 | 12.7 | 1321 | 12652 | 10.4 | 1511 | 12686 | 11.9 | 2.3 | 1.2 | 291 | 1.2 |
| Secondary and above | 1914 | 14142 | 13.5 | 2492 | 14151 | 17.6 | 2078 | 14144 | 14.7 | -4.1 | 0.8 | -577 | 0.8 |
| **Marital Status** |  |  |  |  |  |  |  |  |  |  |  |  |  |
| Never married | 1488 | 12455 | 11.9 | 1218 | 11192 | 10.9 | 1401 | 12054 | 11.6 | 1.1 | 1.1 | 269 | 1.2 |
| Currently married | 1748 | 11769 | 14.8 | 1731 | 11612 | 14.9 | 1741 | 11707 | 14.9 | -0.1 | 1.0 | 17 | 1.0 |
| Others | 1947 | 11891 | 16.4 | 956 | 9406 | 10.2 | 1198 | 10014 | 12.0 | 6.2 | 1.6 | 991 | 2.0 |
| **Religion** |  |  |  |  |  |  |  |  |  |  |  |  |  |
| Hindu | 1718 | 11477 | 15.0 | 1612 | 11218 | 14.4 | 1676 | 11373 | 14.7 | 0.6 | 1.0 | 106 | 1.1 |
| Muslim | 1265 | 13638 | 9.3 | 727 | 9391 | 7.7 | 940 | 11071 | 8.5 | 1.5 | 1.2 | 538 | 1.7 |
| Others | 1643 | 15267 | 10.8 | 996 | 11111 | 9.0 | 1349 | 13378 | 10.1 | 1.8 | 1.2 | 647 | 1.7 |
| **Caste** |  |  |  |  |  |  |  |  |  |  |  |  |  |
| SC/ST | 1395 | 9959 | 14.0 | 1317 | 8310 | 15.8 | 1360 | 9285 | 14.6 | -1.8 | 0.9 | 79 | 1.1 |
| OBC | 1453 | 11566 | 12.6 | 1022 | 10209 | 10.0 | 1240 | 10896 | 11.4 | 2.6 | 1.3 | 431 | 1.4 |
| Others | 2032 | 14165 | 14.3 | 1796 | 13148 | 13.7 | 1940 | 13769 | 14.1 | 0.7 | 1.1 | 236 | 1.1 |
| **MPCE quintile** |  |  |  |  |  |  |  |  |  |  |  |  |  |
| Poorest | 970 | 4563 | 21.3 | 575 | 4720 | 12.2 | 746 | 4652 | 16.0 | 9.1 | 1.7 | 396 | 1.7 |
| Poorer | 1230 | 7363 | 16.7 | 1305 | 7694 | 17.0 | 1261 | 7514 | 16.8 | -0.3 | 1.0 | -75 | 0.9 |
| Middle | 1608 | 10154 | 15.8 | 1269 | 10078 | 12.6 | 1502 | 10130 | 14.8 | 3.2 | 1.3 | 339 | 1.3 |
| Richer | 1983 | 13922 | 14.2 | 1670 | 14758 | 11.3 | 1833 | 14323 | 12.8 | 2.9 | 1.3 | 313 | 1.2 |
| Richest | 2412 | 24247 | 9.9 | 2389 | 23353 | 10.2 | 2404 | 23943 | 10.0 | -0.3 | 1.0 | 23 | 1.0 |
| **Place of residence** |  |  |  |  |  |  |  |  |  |  |  |  |  |
| Rural | 1389 | 9716 | 14.3 | 1094 | 8662 | 12.6 | 1252 | 9230 | 13.6 | 1.7 | 1.1 | 295 | 1.3 |
| Urban | 2106 | 16507 | 12.8 | 1761 | 15253 | 11.5 | 1966 | 15999 | 12.3 | 1.2 | 1.1 | 345 | 1.2 |
| **Geographic region** |  |  |  |  |  |  |  |  |  |  |  |  |  |
| North | 2039 | 15350 | 13.3 | 1932 | 16370 | 11.8 | 2000 | 15720 | 12.7 | 1.5 | 1.1 | 107 | 1.1 |
| Central | 1609 | 10661 | 15.1 | 1554 | 10056 | 15.5 | 1594 | 10491 | 15.2 | -0.4 | 1.0 | 55 | 1.0 |
| East | 1442 | 9175 | 15.7 | 938 | 7641 | 12.3 | 1177 | 8373 | 14.1 | 3.4 | 1.3 | 504 | 1.5 |
| Northeast | 1298 | 10231 | 12.7 | 786 | 10492 | 7.5 | 1064 | 10350 | 10.3 | 5.2 | 1.7 | 512 | 1.7 |
| West | 1502 | 14722 | 10.2 | 1734 | 14139 | 12.3 | 1591 | 14498 | 11.0 | -2.1 | 0.8 | -232 | 0.9 |
| South | 1738 | 13621 | 12.8 | 1317 | 11809 | 11.2 | 1525 | 12703 | 12.0 | 1.6 | 1.1 | 420 | 1.3 |
| Union Territories | 1749 | 20391 | 8.6 | 2347 | 13017 | 18.0 | 2010 | 17170 | 11.7 | -9.5 | 0.5 | -598 | 0.7 |
| **Total** | **1642** | **12111** | **13.6** | **1296** | **10663** | **12.2** | **1488** | **11469** | **13.0** | **1.4** | **1.1** | **346** | **1.3** |

**Source:** Based on the author computation fromPersons with Disabilities in India Survey, NSS, 2018

***Notes:*** *Health Care Burden = [Average (usual monthly expenditure excluding yearly expenditure) out of pocket expenditure (in ₹) /Monthly Consumption Expenditure (MCE in (in ₹`)] *100*

**Table S8. Mental illness (combined above all three condition)**

| **Background Characteristics** | **Male** | | | **Female** | | | **Total** | | | **Gap in**  **HCB** | | **Gap in OOPE** | |
| --- | --- | --- | --- | --- | --- | --- | --- | --- | --- | --- | --- | --- | --- |
| OOPE  (in ₹) | MCE  (in ₹) | Health Care Burden | OOPE  (in ₹) | MCE  (in ₹) | Health Care Burden | OOPE  (in ₹) | MCE  (in ₹) | Health Care Burden | Absolute gap | Ratio | Absolute gap | Ratio |
| *Mean*  *(in ₹)* | *Mean*  *(in ₹)* | *%* | *Mean*  *(in ₹)* | *Mean*  *(in ₹)* | *%* | *Mean*  *(in ₹)* | *Mean*  *(in ₹)* | *%* | *(M-F)* | *M/F* | *(M-F)* | *M/F* |
| **Age (in years)** |  |  |  |  |  |  |  |  |  |  |  |  |  |
| 0-14 | 1918 | 11755 | 16.3 | 1282 | 11445 | 11.2 | 1700 | 11950 | 14.2 | 5.1 | 1.5 | 636 | 1.5 |
| 15-35 | 1383 | 10529 | 13.1 | 1332 | 11949 | 11.1 | 1365 | 11553 | 11.8 | 2.0 | 1.2 | 52 | 1.0 |
| 36-59 | 1567 | 11451 | 13.7 | 1159 | 10432 | 11.1 | 1382 | 11754 | 11.8 | 2.6 | 1.2 | 408 | 1.4 |
| 60 and above | 1846 | 13191 | 14.0 | 1565 | 14634 | 10.7 | 1695 | 12800 | 13.2 | 3.3 | 1.3 | 281 | 1.2 |
| **Education** |  |  |  |  |  |  |  |  |  |  |  |  |  |
| Illiterate | 1551 | 10626 | 14.6 | 1144 | 10945 | 10.5 | 1315 | 10800 | 12.2 | 4.1 | 1.4 | 407 | 1.4 |
| Up to Primary | 1389 | 10567 | 13.1 | 1274 | 12161 | 10.5 | 1345 | 11684 | 11.5 | 2.7 | 1.3 | 115 | 1.1 |
| Middle | 1513 | 11285 | 13.4 | 1327 | 12047 | 11.0 | 1456 | 12267 | 11.9 | 2.4 | 1.2 | 186 | 1.1 |
| Secondary and above | 1864 | 13478 | 13.8 | 2003 | 15589 | 12.9 | 1907 | 16018 | 11.9 | 1.0 | 1.1 | -139 | 0.9 |
| **Marital Status** |  |  |  |  |  |  |  |  |  |  |  |  |  |
| Never married | 1483 | 11561 | 12.8 | 1271 | 12802 | 9.9 | 1420 | 12166 | 11.7 | 2.9 | 1.3 | 212 | 1.2 |
| Currently married | 1659 | 11388 | 14.6 | 1504 | 11718 | 12.8 | 1597 | 12267 | 13.0 | 1.7 | 1.1 | 154 | 1.1 |
| Others | 1671 | 11253 | 14.9 | 1144 | 11821 | 9.7 | 1276 | 12040 | 10.6 | 5.2 | 1.5 | 527 | 1.5 |
| **Religion** |  |  |  |  |  |  |  |  |  |  |  |  |  |
| Hindu | 1629 | 11200 | 14.5 | 1453 | 11993 | 12.1 | 1556 | 11798 | 13.2 | 2.4 | 1.2 | 176 | 1.1 |
| Muslim | 1422 | 12551 | 11.3 | 976 | 11770 | 8.3 | 1187 | 12486 | 9.5 | 3.0 | 1.4 | 447 | 1.5 |
| Others | 1499 | 11342 | 13.2 | 1372 | 13182 | 10.4 | 1454 | 15328 | 9.5 | 2.8 | 1.3 | 127 | 1.1 |
| **Caste** |  |  |  |  |  |  |  |  |  |  |  |  |  |
| ST | 1475 | 9556 | 15.4 | 897 | 8928 | 10.0 | 1212 | 8967 | 13.5 | 5.4 | 1.5 | 578 | 1.6 |
| SC | 1395 | 9465 | 14.7 | 1476 | 9688 | 15.2 | 1424 | 9888 | 14.4 | -0.5 | 1.0 | -81 | 0.9 |
| OBC | 1525 | 11218 | 13.6 | 1115 | 11120 | 10.0 | 1337 | 11228 | 11.9 | 3.6 | 1.4 | 410 | 1.4 |
| Others | 1788 | 13349 | 13.4 | 1687 | 15642 | 10.8 | 1747 | 15321 | 11.4 | 2.6 | 1.2 | 101 | 1.1 |
| **MPCE quintile** |  |  |  |  |  |  |  |  |  |  |  |  |  |
| Poorest | 887 | 4449 | 19.9 | 708 | 4657 | 15.2 | 801 | 4288 | 18.7 | 4.7 | 1.3 | 179 | 1.3 |
| Poorer | 1249 | 7509 | 16.6 | 1228 | 7573 | 16.2 | 1240 | 7446 | 16.7 | 0.4 | 1.0 | 22 | 1.0 |
| Middle | 1473 | 10119 | 14.6 | 1327 | 10186 | 13.0 | 1419 | 10078 | 14.1 | 1.5 | 1.1 | 146 | 1.1 |
| Richer | 1968 | 14030 | 14.0 | 1362 | 14500 | 9.4 | 1663 | 13836 | 12.0 | 4.6 | 1.5 | 606 | 1.4 |
| Richest | 2556 | 24148 | 10.6 | 2253 | 26250 | 8.6 | 2429 | 24487 | 9.9 | 2.0 | 1.2 | 302 | 1.1 |
| **Place of residence** |  |  |  |  |  |  |  |  |  |  |  |  |  |
| Rural | 1374 | 9389 | 14.6 | 1186 | 9345 | 12.7 | 1295 | 9563 | 13.5 | 1.9 | 1.2 | 188 | 1.2 |
| Urban | 1990 | 15605 | 12.7 | 1550 | 16594 | 9.3 | 1789 | 16827 | 10.6 | 3.4 | 1.4 | 439 | 1.3 |
| **Geographic region** |  |  |  |  |  |  |  |  |  |  |  |  |  |
| North | 2146 | 14817 | 14.5 | 1946 | 16650 | 11.7 | 2064 | 16700 | 12.4 | 2.8 | 1.2 | 200 | 1.1 |
| Central | 1675 | 9966 | 16.8 | 1707 | 10879 | 15.7 | 1685 | 10484 | 16.1 | 1.1 | 1.1 | -32 | 1.0 |
| East | 1225 | 8795 | 13.9 | 1016 | 8348 | 12.2 | 1123 | 9275 | 12.1 | 1.8 | 1.1 | 208 | 1.2 |
| Northeast | 1154 | 9040 | 12.8 | 935 | 9838 | 9.5 | 1043 | 10904 | 9.6 | 3.3 | 1.3 | 219 | 1.2 |
| West | 1307 | 12191 | 10.7 | 1629 | 15679 | 10.4 | 1409 | 13718 | 10.3 | 0.3 | 1.0 | -322 | 0.8 |
| South | 1624 | 12789 | 12.7 | 1091 | 12601 | 8.7 | 1348 | 12084 | 11.2 | 4.0 | 1.5 | 533 | 1.5 |
| Union Territories | 2345 | 18831 | 12.5 | 1572 | 21498 | 7.3 | 2001 | 23915 | 8.4 | 5.1 | 1.7 | 773 | 1.5 |
| **Total** | **1579** | **11456** | **13.8** | **1321** | **12024** | **11.0** | **1467** | **11699** | **12.5** | **2.8** | **1.3** | **258** | **1.2** |

**Source:** Based on the author computation fromPersons with Disabilities in India Survey, NSS, 2018

***Notes:*** *Health Care Burden = [Average (usual monthly expenditure excluding yearly expenditure) out of pocket expenditure (in ₹) /Monthly Consumption Expenditure (MCE in (in ₹`)] *100*
