# Supplementary material for: Who Pays More? Gender Gaps in Mental Health Treatment Costs in India
Source: Research Square preprint supplement (doi:10.21203/rs.3.rs-6968917/v1), 2025-10-31
Supplement: Supplementary file 2 [file 8407a12bdf37322223c2520a.docx]

**Table 1. Prevalence of Self-Reported Mental Illness per 1,000 Population by Socio-Demographic Characteristics**

| **Backgrounds Characteristic** | **Unnecessary and excessive worry** | | | **Unusual experience of hearing voices** | | | **Unusual behaviour of difficulty** | | | **Any of Mental illness** | | |
| --- | --- | --- | --- | --- | --- | --- | --- | --- | --- | --- | --- | --- |
| **Male** | **Female** | **Total** | **Male** | **Female** | **Total** | **Male** | **Female** | **Total** | **Male** | **Female** | **Total** |
| **Age (in years)** |  |  |  |  |  |  |  |  |  |  |  |  |
| 0-14 | 0.4 | 0.3 | 0.3 | 0.1 | 0.1 | 0.1 | 0.2 | 0.2 | 0.2 | 0.5 | 0.4 | 0.5 |
| 15-35 | 1.2 | 0.8 | 1.0 | 0.2 | 0.1 | 0.2 | 0.6 | 0.4 | 0.5 | 1.4 | 0.9 | 1.2 |
| 36-59 | 1.8 | 1.4 | 1.6 | 0.4 | 0.4 | 0.4 | 0.8 | 0.7 | 0.8 | 2.0 | 1.6 | 1.8 |
| 60 and above | 2.1 | 2.8 | 2.4 | 0.4 | 0.6 | 0.5 | 1.0 | 1.2 | 1.1 | 2.4 | 3.1 | 2.7 |
| **Education** |  |  |  |  |  |  |  |  |  |  |  |  |
| Illiterate | 2.4 | 1.9 | 2.1 | 0.5 | 0.5 | 0.5 | 1.3 | 0.9 | 1.1 | 2.8 | 2.1 | 2.4 |
| Up to Primary | 1.0 | 0.7 | 0.9 | 0.2 | 0.2 | 0.2 | 0.5 | 0.4 | 0.4 | 1.2 | 0.8 | 1.0 |
| Middle | 1.3 | 0.8 | 1.1 | 0.2 | 0.2 | 0.2 | 0.6 | 0.3 | 0.5 | 1.5 | 0.8 | 1.2 |
| Secondary and above | 0.7 | 0.4 | 0.5 | 0.1 | 0.1 | 0.1 | 0.3 | 0.2 | 0.2 | 0.7 | 0.4 | 0.6 |
| **Marital Status** |  |  |  |  |  |  |  |  |  |  |  |  |
| Never married | 1.3 | 0.9 | 1.1 | 0.3 | 0.2 | 0.2 | 0.6 | 0.5 | 0.6 | 1.5 | 1.1 | 1.3 |
| Currently married | 1.0 | 0.7 | 0.8 | 0.2 | 0.2 | 0.2 | 0.4 | 0.3 | 0.4 | 1.1 | 0.8 | 0.9 |
| Others | 4.5 | 3.7 | 3.9 | 0.8 | 1.1 | 1.0 | 1.9 | 1.8 | 1.8 | 5.1 | 4.1 | 4.3 |
| **Religion** |  |  |  |  |  |  |  |  |  |  |  |  |
| Hindu | 1.2 | 0.9 | 1.0 | 0.2 | 0.2 | 0.2 | 0.6 | 0.4 | 0.5 | 1.3 | 1.1 | 1.2 |
| Muslim | 1.4 | 1.5 | 1.4 | 0.2 | 0.4 | 0.3 | 0.7 | 0.8 | 0.8 | 1.7 | 1.7 | 1.7 |
| Others | 1.8 | 1.3 | 1.6 | 0.3 | 0.3 | 0.3 | 0.8 | 0.7 | 0.7 | 2.0 | 1.5 | 1.8 |
| **Caste** |  |  |  |  |  |  |  |  |  |  |  |  |
| ST/ST | 1.2 | 1.0 | 1.1 | 0.3 | 0.3 | 0.3 | 0.6 | 0.5 | 0.5 | 1.4 | 1.2 | 1.3 |
| OBC | 1.2 | 1.1 | 1.1 | 0.2 | 0.3 | 0.2 | 0.5 | 0.5 | 0.5 | 1.4 | 1.2 | 1.3 |
| Others | 1.2 | 0.9 | 1.1 | 0.3 | 0.2 | 0.2 | 0.6 | 0.5 | 0.6 | 1.4 | 1.1 | 1.3 |
| **MPCE quintile** |  |  |  |  |  |  |  |  |  |  |  |  |
| Poorest | 1.3 | 0.8 | 1.1 | 0.3 | 0.2 | 0.2 | 0.6 | 0.4 | 0.5 | 1.6 | 1.0 | 1.3 |
| Poorer | 1.3 | 1.1 | 1.2 | 0.2 | 0.2 | 0.2 | 0.6 | 0.5 | 0.6 | 1.5 | 1.2 | 1.4 |
| Middle | 1.3 | 1.1 | 1.2 | 0.3 | 0.3 | 0.3 | 0.7 | 0.7 | 0.7 | 1.6 | 1.3 | 1.4 |
| Richer | 1.3 | 1.0 | 1.2 | 0.3 | 0.2 | 0.2 | 0.5 | 0.5 | 0.5 | 1.5 | 1.2 | 1.3 |
| Richest | 1.0 | 1.1 | 1.0 | 0.2 | 0.3 | 0.2 | 0.5 | 0.4 | 0.5 | 1.1 | 1.2 | 1.2 |
| **Place of residence** |  |  |  |  |  |  |  |  |  |  |  |  |
| Rural | 1.3 | 1.0 | 1.2 | 0.3 | 0.3 | 0.3 | 0.6 | 0.5 | 0.6 | 1.5 | 1.2 | 1.4 |
| Urban | 1.0 | 1.0 | 1.0 | 0.2 | 0.2 | 0.2 | 0.5 | 0.4 | 0.5 | 1.2 | 1.1 | 1.1 |
| **Geographic region** |  |  |  |  |  |  |  |  |  |  |  |  |
| North | 1.3 | 1.0 | 1.2 | 0.3 | 0.2 | 0.2 | 0.5 | 0.5 | 0.5 | 1.5 | 1.2 | 1.4 |
| Central | 1.4 | 0.8 | 1.1 | 0.2 | 0.1 | 0.2 | 0.6 | 0.3 | 0.5 | 1.6 | 0.9 | 1.3 |
| East | 1.3 | 1.3 | 1.3 | 0.3 | 0.4 | 0.3 | 0.8 | 0.8 | 0.8 | 1.5 | 1.5 | 1.5 |
| Northeast | 0.7 | 0.8 | 0.7 | 0.1 | 0.2 | 0.1 | 0.4 | 0.4 | 0.4 | 0.9 | 0.9 | 0.9 |
| West | 1.1 | 0.6 | 0.9 | 0.3 | 0.1 | 0.2 | 0.4 | 0.3 | 0.4 | 1.2 | 0.7 | 1 |
| South | 1.1 | 1.3 | 1.2 | 0.3 | 0.3 | 0.3 | 0.5 | 0.5 | 0.5 | 1.2 | 1.4 | 1.3 |
| Union Territories | 0.8 | 0.7 | 0.7 | 0.1 | 0.3 | 0.2 | 0.3 | 0.3 | 0.3 | 0.9 | 0.9 | 0.9 |
| **Total** | 1.2 | 1.0 | 1.1 | 0.2 | 0.2 | 0.2 | 0.6 | 0.5 | 0.5 | 1.4 | 1.2 | 1.3 |
| **Source:** Based on the author computation fromPersons with Disabilities in India Survey, NSS, 2018 | | | | | | | | | | | | |

**Table 2. Gender differences in monthly out of pocket expenditure and Health Care Burden among individuals with mental illness by their selected socioeconomic and demographic characteristics**

| **Background Characteristics** | **Male** | | | **Female** | | | **Total** | | | **Gap in**  **HCB** | | **Gap in OOPE** | |
| --- | --- | --- | --- | --- | --- | --- | --- | --- | --- | --- | --- | --- | --- |
| OOPE  (in ₹) | MCE  (in ₹) | Health Care Burden | OOPE  (in ₹) | MCE  (in ₹) | Health Care Burden | OOPE  (in ₹) | MCE  (in ₹) | Health Care Burden | Absolute gap | Ratio | Absolute gap | Ratio |
| *Mean*  *(in ₹)* | *Mean*  *(in ₹)* | *%* | *Mean*  *(in ₹)* | *Mean*  *(in ₹)* | *%* | *Mean*  *(in ₹)* | *Mean*  *(in ₹)* | *%* | *(M-F)* | *M/F* | *(M-F)* | *M/F* |
| **Age (in years)** |  |  |  |  |  |  |  |  |  |  |  |  |  |
| 0-14 | 2640 | 11755 | 22.5 | 1630 | 11445 | 14.2 | 2522 | 11950 | 21.1 | 8.2 | 1.6 | 1010 | 1.6 |
| 15-35 | 1896 | 10529 | 18.0 | 1874 | 11949 | 15.7 | 2809 | 11553 | 24.3 | 2.3 | 1.1 | 22 | 1.0 |
| 36-59 | 2309 | 11451 | 20.2 | 1646 | 10432 | 15.8 | 2524 | 11754 | 21.5 | 4.4 | 1.3 | 663 | 1.4 |
| 60 and above | 2708 | 13191 | 20.5 | 2458 | 14634 | 16.8 | 2307 | 12800 | 18.0 | 3.7 | 1.2 | 250 | 1.1 |
| **Education** |  |  |  |  |  |  |  |  |  |  |  |  |  |
| Illiterate | 2226 | 10626 | 21.0 | 1857 | 10945 | 17.0 | 1965 | 10800 | 18.2 | 4.0 | 1.2 | 369 | 1.2 |
| Up to Primary | 1987 | 10567 | 18.8 | 1569 | 12161 | 12.9 | 2231 | 11684 | 19.1 | 5.9 | 1.5 | 419 | 1.3 |
| Middle | 2171 | 11285 | 19.2 | 1736 | 12047 | 14.4 | 2691 | 12267 | 21.9 | 4.8 | 1.3 | 434 | 1.3 |
| Secondary and above | 2654 | 13478 | 19.7 | 2841 | 15589 | 18.2 | 3860 | 16018 | 24.1 | 1.5 | 1.1 | -188 | 0.9 |
| **Marital Status** |  |  |  |  |  |  |  |  |  |  |  |  |  |
| Never married | 1989 | 11561 | 17.2 | 1752 | 12802 | 13.7 | 2418 | 12166 | 19.9 | 3.5 | 1.3 | 238 | 1.1 |
| Currently married | 2444 | 11388 | 21.5 | 2090 | 11718 | 17.8 | 2699 | 12267 | 22.0 | 3.6 | 1.2 | 354 | 1.2 |
| Others | 2713 | 11253 | 24.1 | 1861 | 11821 | 15.7 | 2011 | 12040 | 16.7 | 8.4 | 1.5 | 852 | 1.5 |
| **Living with whom** |  |  |  |  |  |  |  |  |  |  |  |  |  |
| Living with spouse and other HH members | 2477 | 11884 | 20.8 | 2158 | 12398 | 17.4 | 2803 | 13348 | 21.0 | 3.4 | 1.2 | 318 | 1.1 |
| Living with spouse only | 2355 | 6870 | 34.3 | 2019 | 6592 | 30.6 | 2308 | 7339 | 31.5 | 3.6 | 1.1 | 335 | 1.2 |
| Living without spouse but with parents children other relatives non-relatives | 2119 | 11718 | 18.1 | 1805 | 12542 | 14.4 | 2288 | 12570 | 18.2 | 3.7 | 1.3 | 314 | 1.2 |
| Living alone | 758 | 3237 | 23.4 | 1706 | 3712 | 46.0 | 1173 | 3994 | 29.4 | -22.5 | 0.5 | -948 | 0.4 |
| **Religion** |  |  |  |  |  |  |  |  |  |  |  |  |  |
| Hindu | 2353 | 11200 | 21.0 | 2222 | 11993 | 18.5 | 2501 | 11798 | 21.2 | 2.5 | 1.1 | 131 | 1.1 |
| Muslim | 2039 | 12551 | 16.3 | 1283 | 11770 | 10.9 | 2298 | 12486 | 18.4 | 5.3 | 1.5 | 756 | 1.6 |
| Others | 1978 | 11342 | 17.4 | 1585 | 13182 | 12.0 | 2544 | 15328 | 16.6 | 5.4 | 1.5 | 393 | 1.2 |
| **Caste** |  |  |  |  |  |  |  |  |  |  |  |  |  |
| ST | 2343 | 9556 | 24.5 | 1870 | 8928 | 20.9 | 1749 | 8967 | 19.5 | 3.6 | 1.2 | 473 | 1.3 |
| SC | 1942 | 9465 | 20.5 | 2700 | 9688 | 27.9 | 2012 | 9888 | 20.3 | -7.3 | 0.7 | -757 | 0.7 |
| OBC | 2298 | 11218 | 20.5 | 1545 | 11120 | 13.9 | 2281 | 11228 | 20.3 | 6.6 | 1.5 | 754 | 1.5 |
| Others | 2384 | 13349 | 17.9 | 2179 | 15642 | 13.9 | 3124 | 15321 | 20.4 | 3.9 | 1.3 | 205 | 1.1 |
| **MPCE quintile** |  |  |  |  |  |  |  |  |  |  |  |  |  |
| Poorest | 1260 | 4449 | 28.3 | 967 | 4657 | 20.8 | 1305 | 4288 | 30.4 | 7.6 | 1.4 | 293 | 1.3 |
| Poorer | 1729 | 7509 | 23.0 | 1635 | 7573 | 21.6 | 2071 | 7446 | 27.8 | 1.4 | 1.1 | 94 | 1.1 |
| Middle | 2039 | 10119 | 20.2 | 1860 | 10186 | 18.3 | 2142 | 10078 | 21.3 | 1.9 | 1.1 | 179 | 1.1 |
| Richer | 2895 | 14030 | 20.6 | 1918 | 14500 | 13.2 | 2579 | 13836 | 18.6 | 7.4 | 1.6 | 978 | 1.5 |
| Richest | 3748 | 24148 | 15.5 | 3762 | 26250 | 14.3 | 4168 | 24487 | 17.0 | 1.2 | 1.1 | -14 | 1.0 |
| **Place of residence** |  |  |  |  |  |  |  |  |  |  |  |  |  |
| Rural | 1971 | 9389 | 21.0 | 1598 | 9345 | 17.1 | 2117 | 9563 | 22.1 | 3.9 | 1.2 | 373 | 1.2 |
| Urban | 2835 | 15605 | 18.2 | 2485 | 16594 | 15.0 | 3112 | 16827 | 18.5 | 3.2 | 1.2 | 351 | 1.1 |
| **Geographic region** |  |  |  |  |  |  |  |  |  |  |  |  |  |
| North | 3244 | 14817 | 21.9 | 2625 | 16650 | 15.8 | 2760 | 16700 | 16.5 | 6.1 | 1.4 | 619 | 1.2 |
| Central | 2509 | 9966 | 25.2 | 2415 | 10879 | 22.2 | 2529 | 10484 | 24.1 | 3.0 | 1.1 | 93 | 1.0 |
| East | 1567 | 8795 | 17.8 | 1288 | 8348 | 15.4 | 1832 | 9275 | 19.8 | 2.4 | 1.2 | 279 | 1.2 |
| Northeast | 1669 | 9040 | 18.5 | 1310 | 9838 | 13.3 | 1887 | 10904 | 17.3 | 5.1 | 1.4 | 359 | 1.3 |
| West | 1874 | 12191 | 15.4 | 3547 | 15679 | 22.6 | 3097 | 13718 | 22.6 | -7.2 | 0.7 | -1673 | 0.5 |
| South | 2298 | 12789 | 18.0 | 1588 | 12601 | 12.6 | 2461 | 12084 | 20.4 | 5.4 | 1.4 | 710 | 1.4 |
| Union Territories | 2869 | 18831 | 15.2 | 1924 | 21498 | 8.9 | 3621 | 23915 | 15.1 | 6.3 | 1.7 | 945 | 1.5 |
| **Total** | **2258** | **11456** | **19.7** | **1926** | **12024** | **16.0** | **2115** | **11699** | **18.1** | **3.7** | **1.2** | **332** | **1.2** |
| **Source:** Based on the author computation from Persons with Disabilities in India Survey, NSS, 2018  **Notes:** Health Care Burden = [Average monthly out of pocket expenditure (in ₹) /Monthly Consumption Expenditure (MCE in (in ₹`)] *100 | | | | | | | | | | | | | |

**Table 3. Impoverishment due to any of mental illness (three category combined)**

| **Background Characteristics** | **Male** | | **Female** | | **Total** | |
| --- | --- | --- | --- | --- | --- | --- |
| ***Poverty headcount*** | ***Poverty gap*** | ***Poverty headcount*** | ***Poverty gap*** | ***Poverty headcount*** | ***Poverty gap*** |
| Age (in years) |  |  |  |  |  |  |
| 0-14 | 20.9 | 9.4 | 13.2 | 1.6 | 18.2 | 6.7 |
| 15-35 | 19.0 | 4.0 | 23.8 | 7.3 | 20.6 | 5.1 |
| 36-59 | 22.2 | 10.3 | 20.6 | 5.4 | 21.5 | 8.0 |
| 60 and above | 23.1 | 10.2 | 18.2 | 10.9 | 20.3 | 10.6 |
| Education |  |  |  |  |  |  |
| Illiterate | 21.1 | 7.9 | 17.9 | 8.1 | 19.2 | 8.0 |
| Up to Primary | 21.8 | 7.9 | 18.9 | 3.8 | 20.6 | 6.3 |
| Middle | 18.7 | 6.9 | 27.0 | 5.4 | 21.4 | 6.4 |
| Secondary and above | 22.3 | 8.9 | 24.1 | 10.9 | 22.9 | 9.6 |
| Marital Status |  |  |  |  |  |  |
| Never married | 16.6 | 4.7 | 20.3 | 4.7 | 17.6 | 4.7 |
| Currently married | 24.7 | 11.2 | 25.0 | 7.4 | 24.8 | 9.6 |
| Others | 25.8 | 8.3 | 14.7 | 8.8 | 17.3 | 8.7 |
| Religion |  |  |  |  |  |  |
| Hindu | 23.0 | 9.1 | 24.1 | 9.8 | 23.4 | 9.4 |
| Muslim | 17.9 | 5.6 | 9.8 | 2.2 | 13.5 | 3.7 |
| Others | 14.1 | 4.7 | 22.5 | 2.8 | 17.1 | 4.0 |
| Caste |  |  |  |  |  |  |
| ST | 19.7 | 12.0 | 31.0 | 9.9 | 25.0 | 11.0 |
| SC | 19.5 | 4.6 | 31.4 | 18.6 | 24.3 | 10.2 |
| OBC | 22.4 | 8.2 | 17.3 | 4.3 | 20.0 | 6.4 |
| Others | 20.6 | 9.1 | 16.7 | 5.6 | 18.9 | 7.6 |
| MPCE quintile |  |  |  |  |  |  |
| Poorest | 0.0 | 0.0 | 0.0 | 0.0 | 0.0 | 0.0 |
| Poorer | 27.2 | 5.2 | 35.1 | 8.7 | 30.3 | 6.6 |
| Middle | 36.9 | 12.5 | 29.3 | 7.2 | 33.4 | 10.0 |
| Richer | 29.6 | 12.4 | 33.0 | 8.9 | 31.1 | 10.9 |
| Richest | 10.8 | 7.3 | 7.1 | 7.4 | 8.8 | 7.3 |
| Place of residence |  |  |  |  |  |  |
| Rural | 22.1 | 8.2 | 23.2 | 6.9 | 22.6 | 7.6 |
| Urban | 19.0 | 7.5 | 15.0 | 8.0 | 17.1 | 7.7 |
| Geographic region |  |  |  |  |  |  |
| North | 23.7 | 9.5 | 16.8 | 5.0 | 20.7 | 7.5 |
| Central | 26.0 | 10.4 | 33.2 | 12.4 | 28.4 | 11.1 |
| East | 24.6 | 6.8 | 19.7 | 4.1 | 22.2 | 5.5 |
| Northeast | 12.5 | 3.3 | 16.5 | 4.1 | 14.6 | 3.7 |
| West | 13.1 | 7.4 | 22.2 | 21.8 | 16.0 | 12.1 |
| South | 17.0 | 6.7 | 16.2 | 5.2 | 16.6 | 5.9 |
| Union Territories | 7.3 | 0.4 | 19.0 | 7.4 | 12.6 | 3.6 |
| Total | **21.1** | **8.0** | **20.2** | **7.3** | **20.7** | **7.7** |
| **Source:** Based on the author computation from Persons with Disabilities in India Survey, NSS, 2018 | | | | | | |

**Table 4: Blinder-Oaxaca Decomposition of Male–Female Differences in Out-of-Pocket Expenditure for Mental Health Care by Socioeconomic and Demographic Characteristics**

| **Differential** | ***Coefficient*** | ***SE*** | ***95% CI*** | ***Coefficient*** | ***SE*** | ***95% CI*** |
| --- | --- | --- | --- | --- | --- | --- |
| Mean prediction high (Male) | 7.131 | 0.0346 | (7.063, 7.199) |  | | |
| Mean prediction low (Female) | 6.877 | 0.0693 | (6.742, 7.013) |
| Raw differential (R) (Male-Female) | 0.254 | 0.077 | (0.102, 0.405) |
|  | ***Endowments (Explained)*** | | | ***Coefficients (Unexplained)*** | | |
| **Individual Factors** |  |  |  |  |  |  |
| Age | -0.034 | 0.019 | (-0.072, 0.004) | -0.272 | 0.242 | (-0.748, 0.204) |
| Education | 0.078 | 0.024 | (0.029, 0.126) | -0.084 | 0.094 | (-0.27, 0.101) |
| Marital Status | 0.029 | 0.046 | (-0.062, 0.121) | 0.319 | 0.242 | (-0.156, 0.794) |
| **Household Factors** |  |  |  |  |  |  |
| Religion | 0.006 | 0.014 | (-0.023, 0.034) | 0.250 | 0.139 | (-0.024, 0.523) |
| Caste | 0.000 | 0.001 | (-0.002, 0.002) | -0.039 | 0.189 | (-0.41, 0.331) |
| Wealth Quintile | -0.006 | 0.027 | (-0.06, 0.048) | 0.032 | 0.141 | (-0.245, 0.308) |
| **Community Factors** |  |  |  |  |  |  |
| Place of residence | 0.000 | 0.003 | (-0.006, 0.007) | 0.082 | 0.158 | (-0.228, 0.393) |
| Region of Residence | 0.029 | 0.015 | (-0.001, 0.06) | 0.030 | 0.081 | (-0.129, 0.189) |
